# Supplementary material for: Tuning the surface charge density of exfoliated thin molybdenum disulfide sheets via non-covalent functionalization for promoting hydrogen evolution reaction
Source: Royal Society of Chemistry journal article supplement (doi:10.1039/c9tc03813b), 2019-10-10
Supplement: c9tc03813b2.pdf [file c9tc03813b2.pdf]

## Supporting Information

### **Tuning the Surface Charge Density of Exfoliated Thin Molybdenum Disulfide Sheets via Non-Covalent Functionalization for Promoting Hydrogen Evolution Reaction**

*Wei-Ming Huang,<sup>a</sup> Wei-Sheng Liao,<sup>a</sup> Yan-Ming Lai,<sup>a</sup> I-Wen Peter Chen<sup>\*a</sup>*

Dr. I-W. P. Chen, W.-M. Huang

Department of Applied Science, National Taitung University, Taitung City (95092), Taiwan

E-mail: iwchen@nttu.edu.tw

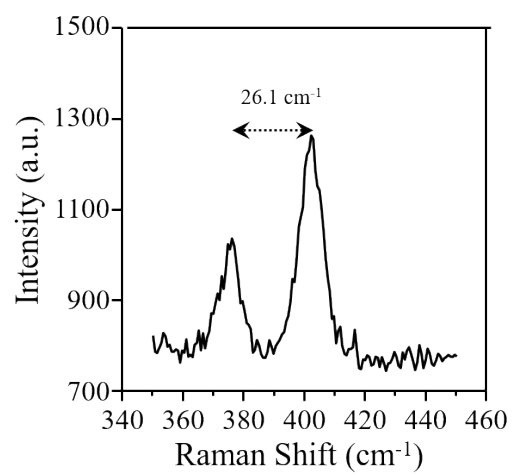

Figure S1. Characteristic peaks of Raman spectra for bulk MoS<sub>2</sub>.

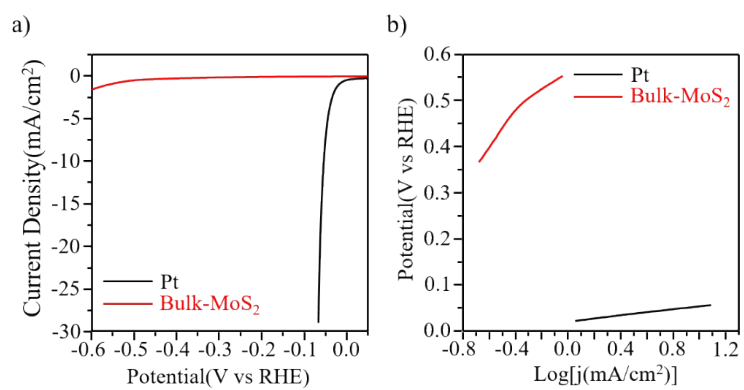

Figure S2. a) LSV and b) Tafel plots of Pt and bulk-MoS<sub>2</sub>.

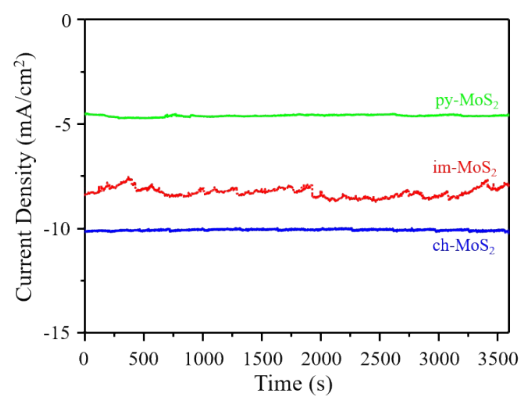

Figure S3. Chronoamperometric response recorded from the py-MoS<sub>2</sub>, im-MoS<sub>2</sub>, and ch-MoS<sub>2</sub> electrode at a constant potential of -400 mV, -300 mV, and -200 mV, respectively.

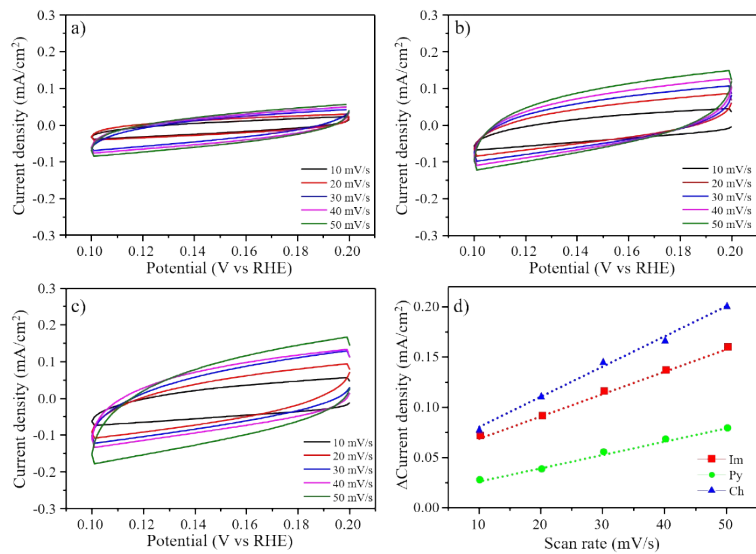

Figure S4. Cyclic voltammetry curves in the region of 0.1 ~ 0.2 V vs. RHE for a) py-MoS<sub>2</sub>, b) im-MoS<sub>2</sub>, c) ch-MoS<sub>2</sub>. d) Capacitive currents at 150 mV as a function of scan rate for py-MoS<sub>2</sub>, im-MoS<sub>2</sub>, and ch-MoS<sub>2</sub>.

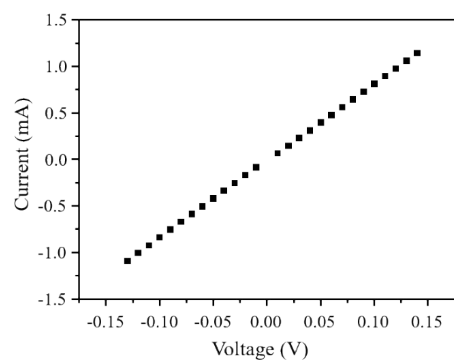

Figure S5. Electrical conductivity of 2 cm (width) x 2cm (length) ch-MoS<sub>2</sub>/CNTs paper (thickness: 20  $\mu$ m).

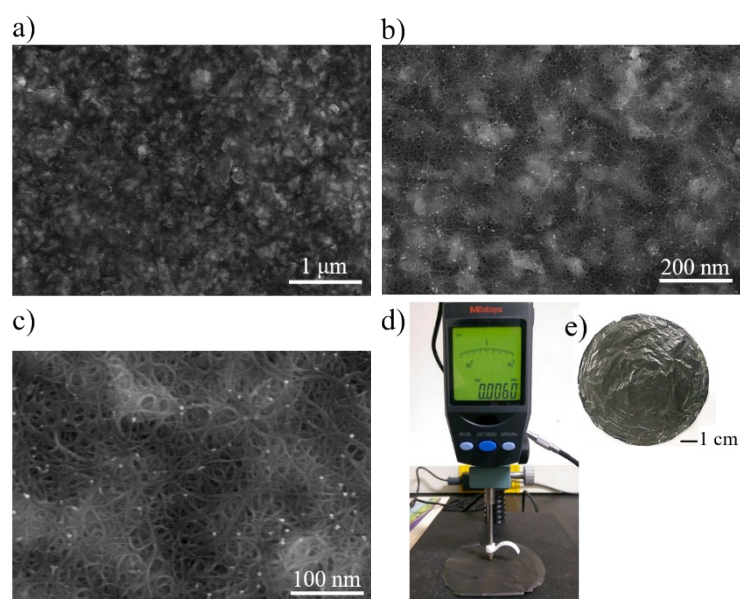

Figure S6. SEM images of the ch-MoS<sub>2</sub>/PtNPs/CNTs. a) Low and b)-c) High magnification. d) Thickness measurement of the ch-MoS<sub>2</sub>/PtNPs/CNTs paper electrode (unit: mm). e) Photograph of the ch-MoS<sub>2</sub>/PtNPs/CNTs.

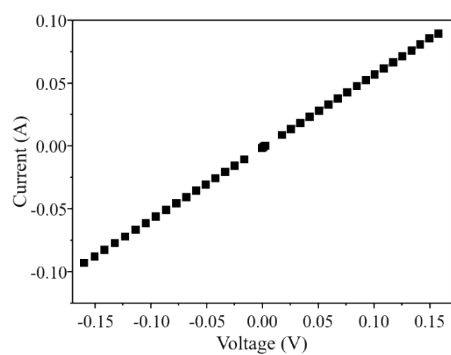

Figure S7. Electrical conductivity of ch-MoS<sub>2</sub>/PtNPs/CNTs paper.



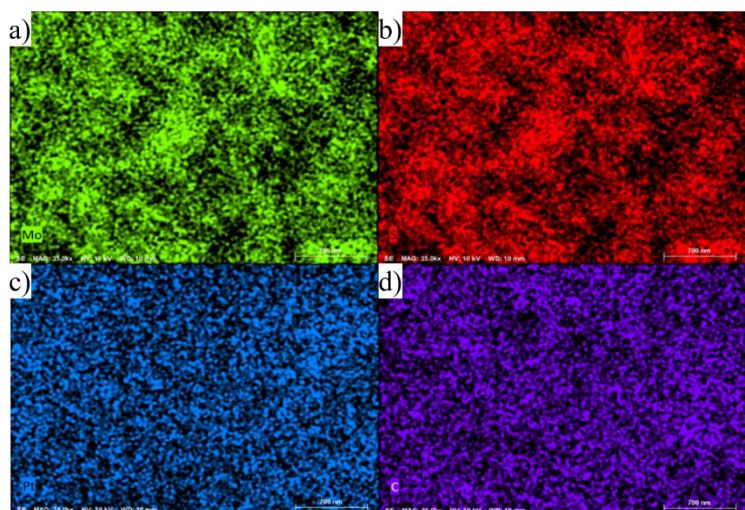

Figure S8. EDS mapping images of a) Mo, b) S, c) Pt, and d) C of the ch-MoS<sub>2</sub>/PtNPs/CNTs paper.

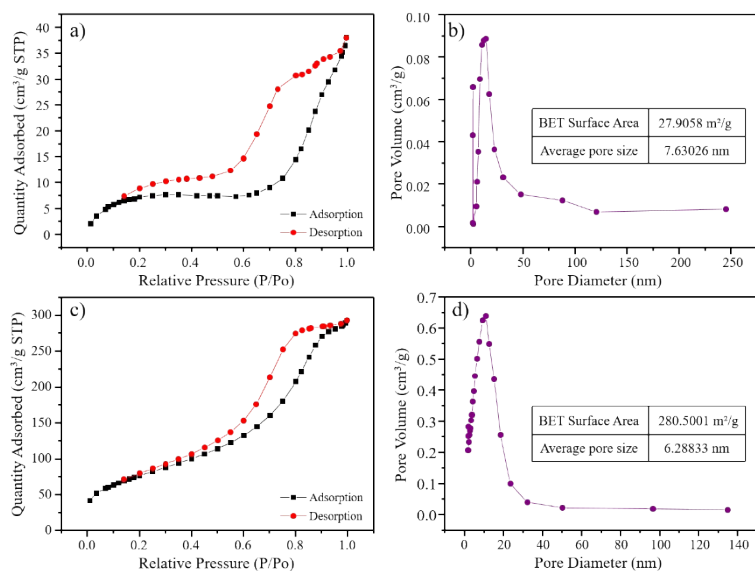

Figure S9. a) N<sub>2</sub> adsorption/desorption isotherms and b) pore size distribution of ch-MoS<sub>2</sub>/CNTs. c) N<sub>2</sub> adsorption/desorption isotherms and d) pore size distribution of ch-MoS<sub>2</sub>/PtNPs/CNTs.

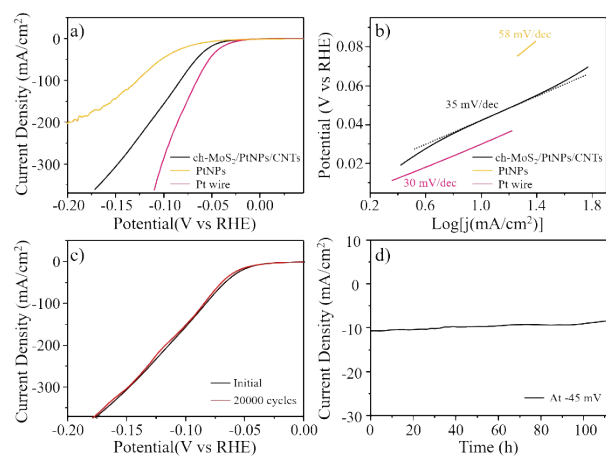

Figure S10. a) LSV, b) Tafel slope, c)-d) HER stability measurements for the flexible ch-MoS<sub>2</sub>/PtNPs/CNTs electrode.

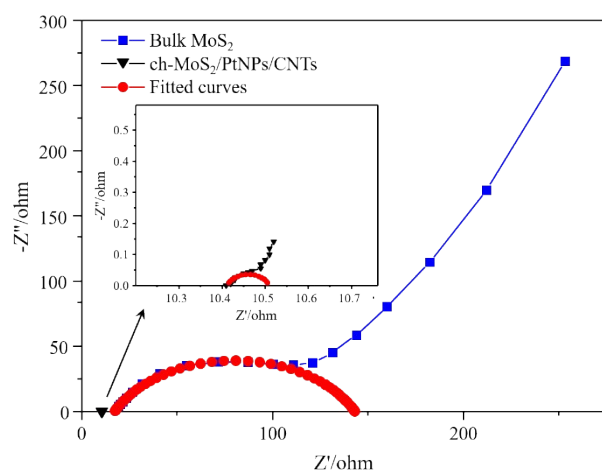

Figure S11. Electrochemical impedance spectroscopy (EIS) curves of ch-MoS<sub>2</sub>/PtNPs/CNTs and bulk MoS<sub>2</sub>.

Table S1. EDS analysis of the ch-MoS<sub>2</sub>/PtNPs/SWCNT paper.

| Element    | Atom (%) |
|------------|----------|
| Platinum   | 0.52     |
| Molybdenum | 3.54     |
| Sulfur     | 6.86     |
| Carbon     | 86.12    |
| Oxygen     | 2.93     |
